# Supplementary material
Source: PubMed Central journal article supplement (PMC6713562)
Supplement: EMS83857-supplement-Supplemental_Information.pdf [file EMS83857-supplement-Supplemental_Information.pdf]

## Supplemental Information

### **Time-resolved small RNA sequencing unravels the molecular principles of microRNA homeostasis**

Brian Reichholf<sup>1</sup>, Veronika A. Herzog<sup>1</sup>, Nina Fasching, Raphael A. Manzenreither, Ivica Sowemimo, and Stefan L. Ameres\*

Institute of Molecular Biotechnology (IMBA), Vienna BioCenter (VBC), 1030 Vienna, Austria.

<sup>1</sup> These authors contributed equally

\* Lead contact and corresponding author (stefan.ameres@imba.oeaw.ac.at)

Supplemental Information includes **one Supplemental Table** and **six Supplemental Figures**.

**Supplementary Table 1I** Oligonucleotides used in this study. Related to STAR Methods.

*Guide RNA target sequence used for CRISPR/Cas9 genome editing (PAM sequences highlighted in bold).*

| <b>Name</b>     | <b>DNA sequence (5'-3')</b>     |
|-----------------|---------------------------------|
| gRNA Nbr KO #1  | TATACATGTTCCACTTCTCG <b>CGG</b> |
| gRNA Nbr KO #2  | TCTGCGCCAGGAATTTGGA <b>AGGG</b> |
| gRNA Nbr KO #3  | ACTTGGGAAGCAGTAGGT <b>CGCGG</b> |
| gRNA Nbr KO #4  | GATTTCCCGCATCTTGG <b>CGAGG</b>  |
| gRNA Ago2 KO #1 | AGCAAAAGCAACAACAACA <b>ACGG</b> |
| gRNA Ago2 KO #2 | TGTGGTTGTTGCAGCTGCT <b>GTGG</b> |

*Synthetic RNA oligonucleotides used for quantification of miRNA molecules per cell.*

| <b>Name</b>                 | <b>RNA sequence (5'-3')</b>    |
|-----------------------------|--------------------------------|
| synthetic miR-184-3p        | UGGACGGAGAACUGAU <b>AAGGGC</b> |
| synthetic <i>bantam</i> -3p | UGAGAUCAUUUUGAAAGCUGAUU        |

*Probes for Northern hybridization.*

| <b>Name</b>                | <b>DNA sequence (5'-3')</b>    |
|----------------------------|--------------------------------|
| miR-34-5p (21-mer)         | AACCAGCTAACCACACTGCCA          |
| <i>bantam</i> -3p (23-mer) | AATCAGCTTTCAAATGATCTCA         |
| miR-184-3p (22-mer)        | GCCCTTATCAGTTCTCCGTCCA         |
| 2S rRNA                    | TACAACCCTCAACCATATGTAGTCCAAGCA |

## Supplemental Figures

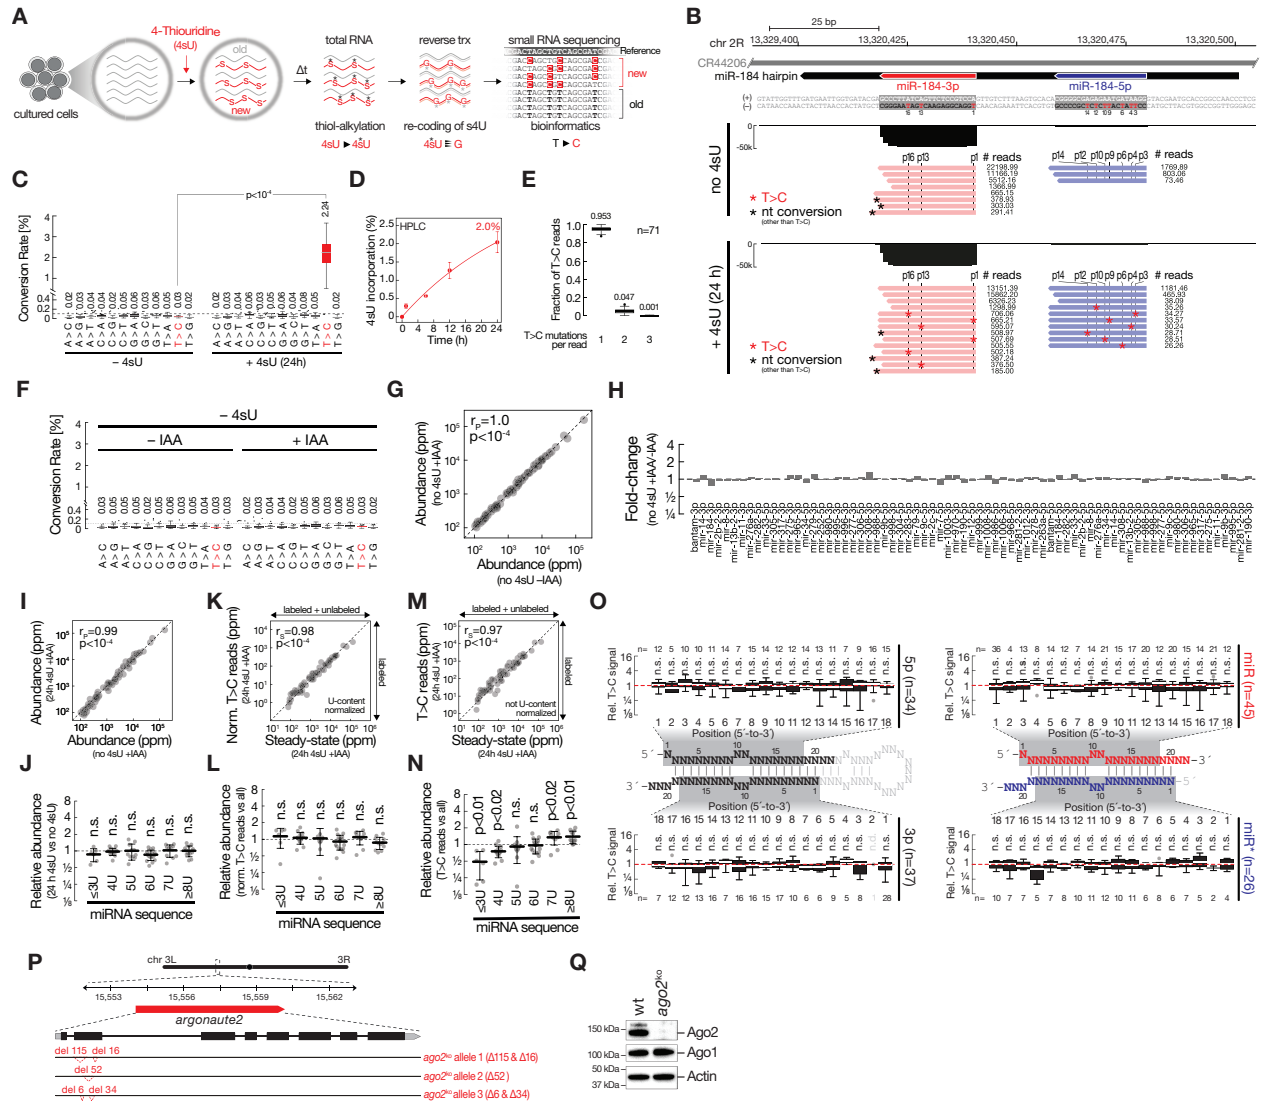

**Figure S1. Thiol-linked alkylation for the metabolic sequencing (SLAMseq) of small RNAs in S2 cells.** Related to STAR Methods. **(A)** Schematic overview of SLAMseq. Cells are treated with 4-thiouridine (4sU), which – upon cellular uptake – incorporates into newly transcribed RNA. Following 4sU labelling for different time periods and total RNA preparation, 4sU-residues present in newly generated RNA species are carboxyamidomethylated by treatment with iodoacetamide (IAA), resulting in altered base-pairing (i.e. alkylated 4sU preferentially base-pairs to guanine instead of adenine). When combined with well-established small RNA library preparation protocols, the presence of the bulky group at the sites of 4sU-incorporation results in the specific and quantitative incorporation of G across alkylated 4sU during reverse transcription (reverse trx, RT). 4sU-containing sites can be identified bioinformatically in high-throughput sequencing libraries at single nucleotide resolution by calling T-to-C conversions. **(B)** Representative genome browser screen shot for small RNA libraries generated from size-selected total RNA of *Drosophila* S2 cells. A representative area in the *Drosophila melanogaster* genome encoding miR-184 is shown. Nucleotide positions encoding thymine (T, red) are indicated relative to the 5' end of each small RNA species. Reads representing 99% of all 5' isoforms are shown for miR-184-3p and -5p and the respective number of reads are indicated in parts per million (ppm). **(C)** Small RNA sequencing libraries generated from total RNA of wild-type *Drosophila* S2 cells before and after 4sU metabolic labeling for 24 h were

mapped to annotated miRNAs and any given conversion rate was determined for abundantly expressed miRNAs (>100 ppm). Tukey boxplots show nucleotide-composition normalized, mean conversions per miRNA (in percent), as determined across positions 1-18. Outliers are not shown. Median observed frequency for each individual conversion are indicated. P-value, as determined by Mann-Whitney test is indicated. **(D)** Quantification of 4sU-incorporation into total RNA after 4sU-metabolic labeling for the indicated time in a pulse labeling experiment in wild-type *Drosophila* S2 cells. Substitution rate of 4sU compared to unmodified uridine determined by HPLC is shown. Values represent mean  $\pm$  stdev of three independent replicates. Maximum incorporation rate after 24 h labeling is indicated. **(E)** Tukey boxplots show the fraction of T>C conversion containing reads with one, two, or three T>C conversions for each of 71 abundantly expressed (>100 ppm) miRNAs in small RNA libraries prepared from size selected total RNA of wild-type *Drosophila* S2 cells subjected to 4sU metabolic labeling for 24 h. The median fraction of T>C conversion containing reads is indicated. **(F)** Any given conversion rate in small RNA sequencing libraries generated from total RNA of wild-type *Drosophila* S2 cells before and after treatment with iodoacetamide was determined for each abundantly expressed miRNA (>100 ppm). Tukey boxplots show conversions per miRNA in percent. Outliers are not shown. Median observed frequency for each individual conversion is indicated. **(G)** Abundance of miRNAs in small RNA libraries prepared from iodoacetamide-treated or untreated total RNA. Pearson correlation coefficient ( $r_P$ ) and associated p-value is indicated. **(H)** Fold-change in expression for individual miRNAs in small RNA libraries prepared from iodoacetamide-treated relative to untreated total RNA. **(I-J)** Steady-state abundance of miRNAs is not impacted by 4sU labeling. **(I)** Abundance of miRNAs (>100 ppm, n=71) in small RNA libraries prepared from 4sU labeled (24h 4sU+IAA) or non-labeled (no 4sU+IAA) wild-type *Drosophila* S2 cells. Pearson correlation coefficient ( $r_P$ ) and associated p-value is indicated. Dashed line represents  $x=y$ . **(J)** Abundantly expressed miRNAs (>100 ppm, n=71) were grouped according to their U content in the mature miRNA sequence ( $n_{\leq 3U}=6$ ,  $n_{4U}=15$ ,  $n_{5U}=11$ ,  $n_{6U}=17$ ,  $n_{7U}=10$ ,  $n_{\geq 8U}=12$ ) and their relative abundance in small RNA libraries prepared from 4sU labeled (24h 4sU+IAA) versus non-labeled (no 4sU+IAA) wild-type *Drosophila* S2 cells was analyzed. P-values were determined using Kruskal-Wallis test comparing each subgroup to all 71 miRNAs (n.s.,  $p>0.05$ ). **(K)** Correlation of T>C containing reads (in parts per million, ppm) and all reads (steady-state, in ppm) at steady-state labeling conditions (24h 4sU) of abundantly expressed miRNAs (>100 ppm, n=71) in a small RNA SLAMseq experiment in wild-type *Drosophila* S2 cells. T>C reads were U-content and 4sU-labeling-efficiency normalized (norm. ppm). Spearman correlation coefficient ( $r_S$ ) and associated p-value is indicated. **(L)** MicroRNAs were grouped according to their U-content as in (B) and the relative abundance of 4sU-labeling-efficiency and U-content normalized T>C reads compared to all reads was analyzed. P-values were determined using Kruskal-Wallis test comparing each subgroup for over- or underrepresentation relative to all 71 miRNAs (n.s.,  $p>0.05$ ). **(M)** Correlation of T>C containing reads (in ppm) and all reads (steady-state, in ppm) at steady-state labeling conditions (24h 4sU) as in (C), but T>C reads were not U-content normalized. Spearman correlation coefficient ( $r_S$ ) and associated p-value is indicated. **(N)** MicroRNAs were grouped according to their U-content as in (B) and the relative abundance of 4sU-labeling-efficiency normalized T>C reads compared to all reads was analyzed. T>C reads were not U-content normalized. P-values were determined using Kruskal-Wallis test comparing each subgroup for over- or underrepresentation relative to all 71 miRNAs (n.s.,  $p>0.05$ ). **(O)** Over- or underrepresentation of T>C conversions at individual positions of small RNAs that are derived from the 5p- or 3p arm of a miRNA precursor (left), or that constitutes a miR or miR\* strand, as defined by selective Argonaute-loading (right). Results are derived from 71 abundantly expressed (>100 ppm) miRNAs (corresponding to 34 5p- and 37 3p-miRNAs, or 45 miR and 26 miR\*). Statistically significant differences in relative representation were compared to the total population for the indicated position by Kruskal-Wallis test. n.s.,  $p>0.05$ ; n.d., not determined due to limited data points. **(P)** Schematic representation of the *argonaute 2* (*ago2*) locus in the *Drosophila melanogaster* genome. Zoom-in shows the *ago2* gene (UTRs in grey, exons in black, intron as black line). Disruptive frameshift deletions (del) on three alleles of the *ago2*<sup>ko</sup> clone used in all following experiments are shown. **(Q)** Western blot analysis of wild-type (wt) S2 cells, or S2 cells stably depleted of Ago2 by CRISPR/Cas9 genome engineering (*ago2*<sup>ko</sup>). Ago1 levels were unaffected. Actin represents loading control.

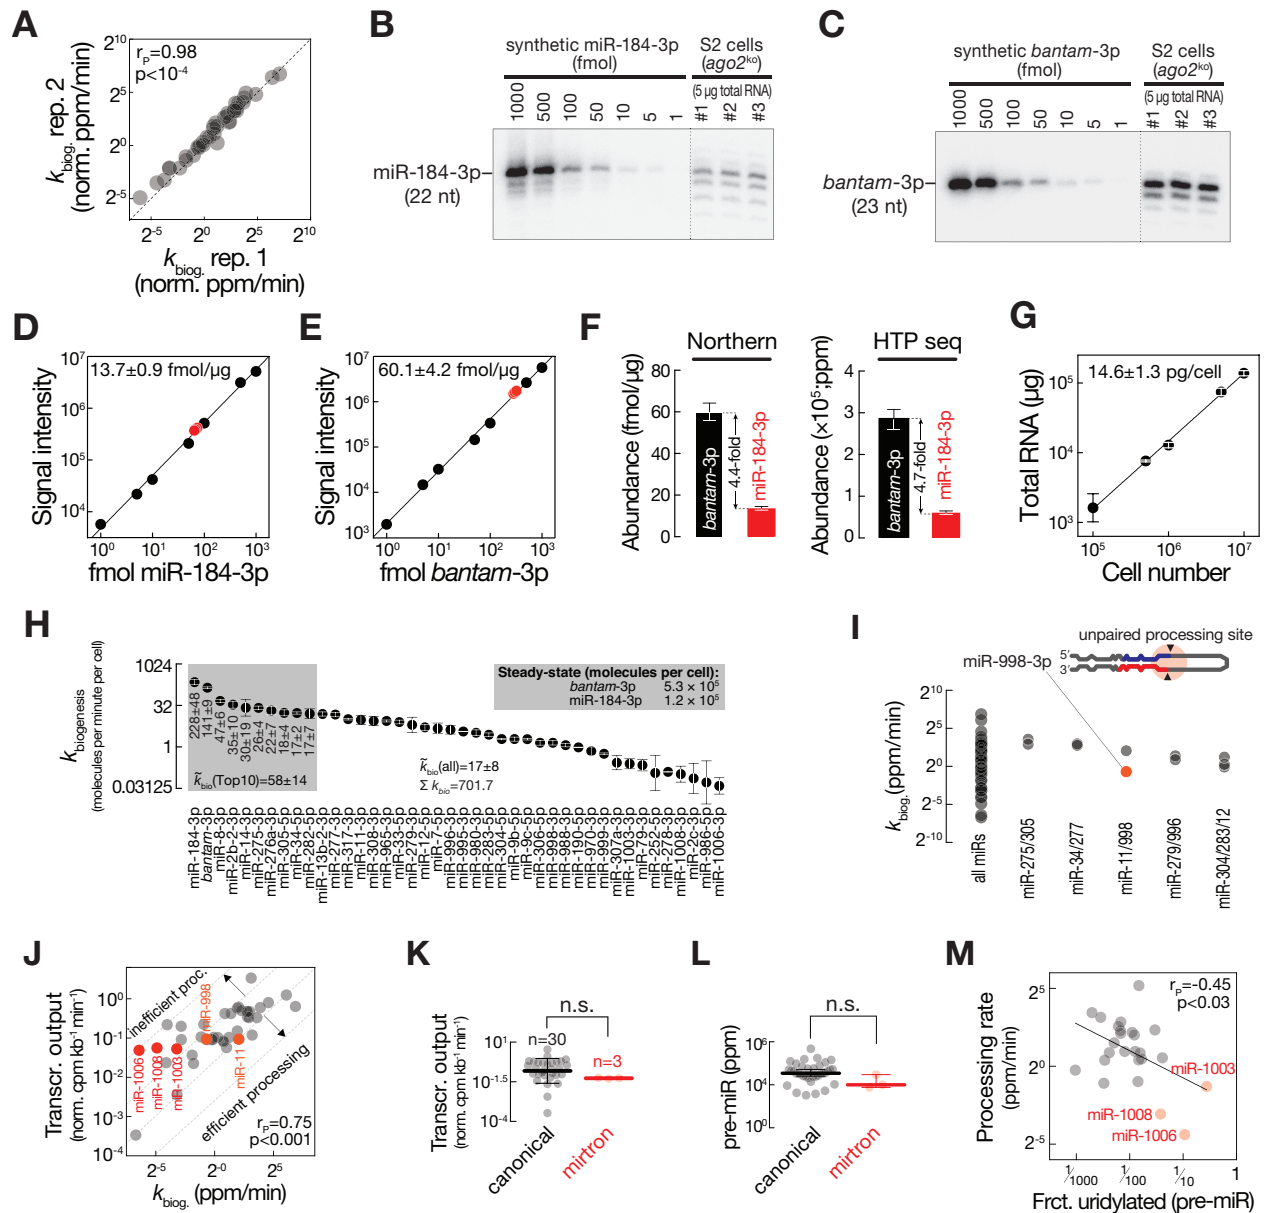

**Figure S2. Reproducible measurements of absolute miRNA biogenesis rates by SLAMseq.** Related to Figure 1. **(A)** Biogenesis rate ( $k_{\text{biog}}$ , norm. ppm/min) was assessed for each of the abundantly expressed miRNA (>100 ppm,  $n=42$ ) from the number of library-depth-, sequence-content-, and 4sU-labeling-efficiency-normalized T>C conversion-containing reads at early time-points of the measurement (i.e. 5 min, 15 min and 30 min) in two independent replicates of SLAMseq small RNA libraries prepared from *ago2*<sup>ko</sup> S2 cells. Dashed line indicates  $x=y$ . Pearson correlation coefficient ( $r_p$ ) and associated p-value is indicated. **(B)** and **(C)** Northern hybridization experiment to assess the number of miR-184-3p (B) or bantam-3p (C) molecules per  $\mu\text{g}$  of total RNA. A standard series of titrated amounts (1000 – 1 fmol) of synthetic miR-184-3p (B) or *bantam*-3p (C) and three replicates of 5  $\mu\text{g}$  of total RNA extracted from *ago2*<sup>ko</sup> S2 cells were loaded on the Northern blot and probed for the indicated miRNA. **(D)** and **(E)** Quantification of the signal intensity of synthetic miR-184-3p (D) or *bantam*-3p (E) dilution series (in black) was fit to linear regression to determine the amount of the respective miRNA in 5  $\mu\text{g}$  of total RNA (in red) as measured by Northern

hybridization shown in (B) or (C), respectively. **(F)** Abundance of *bantam*-3p and miR-184-3p (in fmol per  $\mu\text{g}$  total RNA) assessed by Northern blotting (left) or high-throughput sequencing (right, in ppm). Data represent mean  $\pm$  stdev of three (Northern) or two (HTP seq) independent experiments. Relative abundance of *bantam*-3p and miR-184-3p (as indicated by fold-difference) is similar between the two detection methods. **(G)** Mean total RNA yield from a titration series of the indicated number of *Drosophila* S2 cells was determined to assess the RNA content per cell by linear regression. Data represent mean  $\pm$  stdev of three independent experiments. **(H)** Absolute biogenesis rates ( $k_{\text{biogenesis}}$ , in molecules per minute per cell) for abundantly expressed ( $n=42$ ) miRNAs in *ago2*<sup>ko</sup> S2 cells. Data represent mean  $\pm$  stdev of two independent experiments. Average biogenesis rate  $\pm$  stdev of the ten miRNAs with the highest biogenesis rates (shaded grey area) ( $k_{\text{bio}}[\text{Top10}]$ ) and all miRNAs analyzed ( $k_{\text{bio}}[\text{all}]$ ,  $n=42$ ) is indicated.  $\sum k_{\text{bio}}$  indicates the total number of miRNA molecules (derived from the 42 most abundant miRNAs in S2 cells) produced per minute per cell. The steady-state abundance (molecules per cell) of *bantam*-3p and miR-184-3p as assessed in (B-G) is indicated.

**(I)** Cistronic miRNAs tend to share similar biogenesis rates. Biogenesis rate ( $k_{\text{biog}}$ , in ppm/min) for all abundantly expressed ( $> 100$  ppm) miRs in *ago2*<sup>ko</sup> S2 cells ( $n=42$ , all miRs) or grouped by cistronic cluster. Stem-loop structure of pri-miRNA encoding miR-998-3p (marked in red) as reported in miRbase is indicated (Kozomara and Griffiths-Jones, 2010). Extension of unpaired miRNA loop region into the destined miRNA duplex in miR-998 may explain slow biogenesis rates compared to miR-11, derived from the same primary transcript. **(J)** Correlation of transcriptional output (normalized counts per million (cpm) per kilobase and minute; determined by TT-SLAMseq) and miRNA biogenesis rate ( $k_{\text{biog}}$ , in ppm/min) for abundantly expressed miRNAs in *ago2*<sup>ko</sup> S2 cells ( $n=42$ ). Mirtrons (i.e. miR-1006, miR-1003, and miR-1008) are highlighted in red and exhibit inefficient processing kinetics. Among the miR-11/998 cluster-encoded miRNAs (marked in orange), miR-998 exhibits slower biogenesis rates compared to miR-11. Pearson correlation coefficient ( $r_P$ ) and associated p-value is indicated. **(K)** Comparison of primary-miRNA transcriptional output (normalized cpm per kilobase and minute; determined by TT-SLAMseq) of canonical miRNA ( $n=30$ ) and mirtron ( $n=3$ ) producing loci. P-value (Mann-Whitney test; n.s.,  $p>0.05$ ) is indicated. **(L)** Steady-state pre-miRNA abundance in parts per million (ppm) for canonical miRNAs (grey,  $n=39$ ) or mirtrons (red,  $n=3$ ), as previously reported (Reimão-Pinto et al., 2015). P-value (Mann-Whitney test; n.s.,  $p>0.05$ ) is indicated. **(M)** Correlation of pre-miRNA uridylation (as determined by (Reimão-Pinto et al., 2015)) and miRNA processing rates (i.e. transcriptional output-normalized mature miRNA biogenesis rates; in ppm per minute) for 25 miRs that are abundantly expressed ( $> 100$  ppm) in *ago2*<sup>ko</sup> S2 cells and show detectable uridylation signature. Mirtrons are highlighted in red. Linear regression is shown. Pearson correlation coefficient ( $r_P$ ) and associated p-value is indicated.

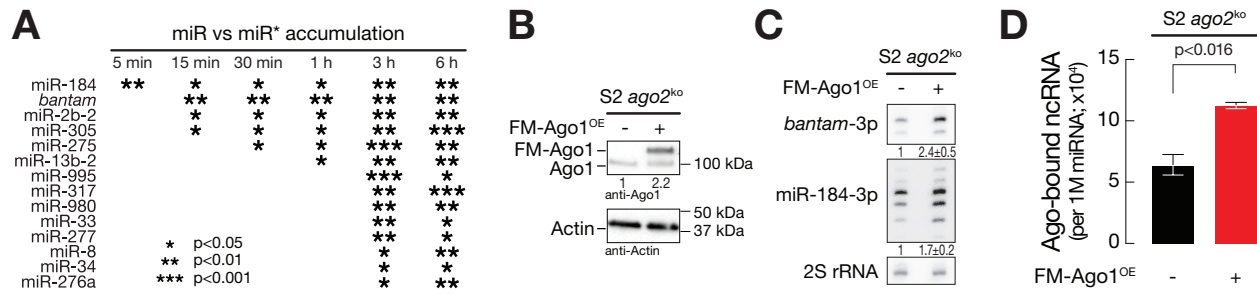

**Figure S3. Intracellular kinetics of microRNA loading.** Related to Figure 2. **(A)** Ago1-loading rates vary between individual miRNA duplexes. Ago1-loading was deduced by determining statistically significant, consecutive higher accumulation of 4sU-labeled miR strands compared to its miR\* partner. P-value (Student's t-test) is indicated. **(B)** Western blot analysis probing for Ago1 protein levels in *ago2<sup>ko</sup>* S2 cells or *ago2<sup>ko</sup>* S2 cells expressing FLAG-MYC-tagged Ago1 (FM-Ago1<sup>OE</sup>). Actin shows loading control. Relative quantification of total Ago1 levels is shown. **(C)** Representative Northern hybridization assay of *bantam-3p* and miR-184-3p in *ago2<sup>ko</sup>* S2 cells or *ago2<sup>ko</sup>* S2 cells expressing FLAG-MYC-tagged Ago1 (FM-Ago1<sup>OE</sup>). Quantification of *bantam-3p* and miR-184-3p normalized to 2S rRNA (loading control) of three independent experiments (mean  $\pm$  stdev) is reported below the respective blots. **(D)** Ago-bound noncoding RNA levels (ncRNAs, normalized to 1 million miRNAs) is shown for *ago2<sup>ko</sup>* S2 cells (in black) and *ago2<sup>ko</sup>* S2 cells expressing FLAG-MYC-tagged Ago1 (in red, *ago2<sup>ko</sup>*; FM-Ago1<sup>OE</sup>). Analyzed non-coding RNAs comprise of rRNA, tRNA, snRNA and snoRNA species. Data shows mean  $\pm$  stdev of two independent replicates. P-value (two-tailed unpaired t-test) is indicated.

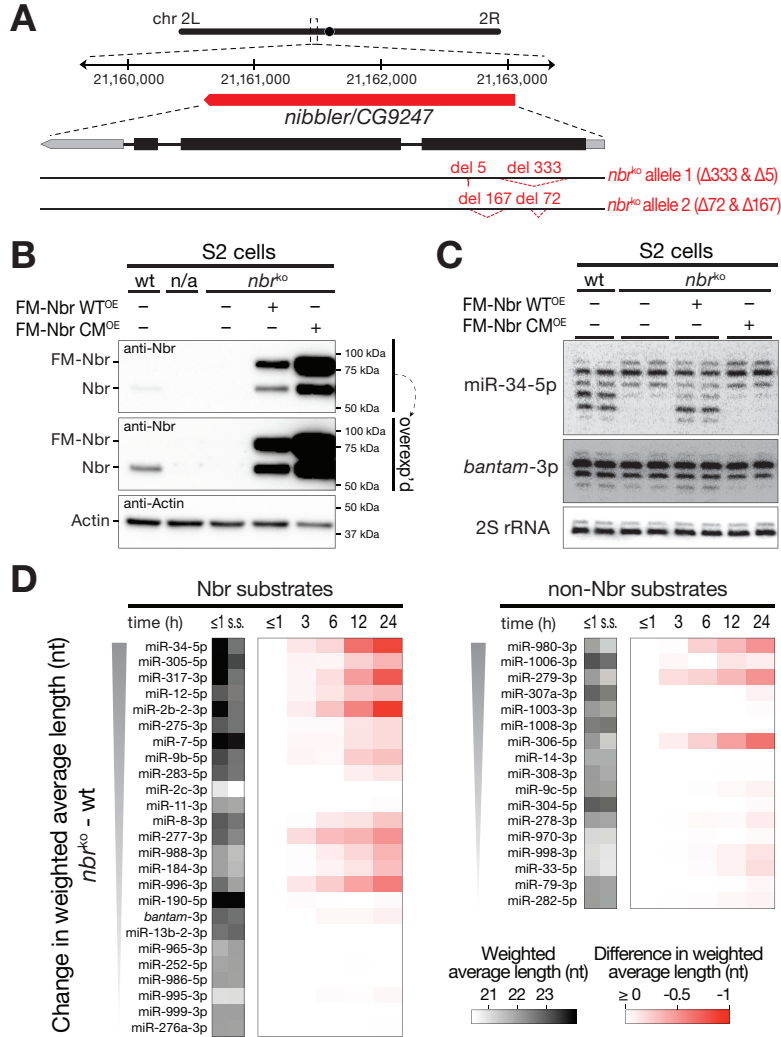

**Figure S4. Intracellular kinetics of Nbr-mediated exonucleolytic miRNA trimming.** Related to Figure 3 and STAR Methods. **(A)** Schematic representation of the *nibbler* (*nbr*) locus in the *Drosophila melanogaster* genome. Zoom-in shows the *nbr* gene (UTRs in grey, exons in black, intron as black line). Disruptive frameshift deletions (del) on two alleles of the *nbr*<sup>ko</sup> clone are shown. **(B)** Western blot analysis of Nibbler (Nbr) in wild-type (wt) and *nbr*<sup>ko</sup> S2 cells, as well as *nbr*<sup>ko</sup> S2 cells expressing FLAG-MYC-tagged wild-type (FM-Nbr-WT<sup>OE</sup>) or catalytic-mutant Nbr (FM-Nbr CM<sup>OE</sup>). Actin serves as loading control. n/a, cell lysate not used in this study. **(C)** Northern hybridization assay for miR-34-5p, *bantam*-3p and 2S rRNA in wild-type (wt) and *nbr*<sup>ko</sup> S2 cells, as well as *nbr*<sup>ko</sup> S2 cells expressing FLAG-MYC-tagged wild-type (FM-Nbr-WT<sup>OE</sup>) or catalytic-mutant Nbr (FM-Nbr CM<sup>OE</sup>). Two independent biological replicates are shown. **(D)** Heat map represents the weighted average length (in grey scale) of 4sU-labeled miRNAs from early 4sU labeling time-points (≤1h) or of all reads across the entire time-course (steady-state, s.s.) and the difference in weighted average nucleotide length (in red scale) of 4sU-labeled miRNAs across a 4sU labeling time-course in *ago2*<sup>ko</sup> S2 cells for Nbr substrates (left) or non-Nbr substrates (right). MicroRNAs are ranked according to the change in weighted average nucleotide length in cells, in which Nbr was functionally depleted (*nbr*<sup>ko</sup> or *nbr*<sup>ko</sup>;FM-Nbr-CM<sup>OE</sup>), compared to cells containing functional Nbr protein (wt or *nbr*<sup>ko</sup>;FM-Nbr-WT<sup>OE</sup>). The T>C containing reads from early 4sU labeling time-points (≤1h) were merged prior to the analysis. Nbr substrates were defined by a significant increase in weighted average length (two-tailed Student's t-test, p<0.01) in small RNA libraries generated from S2 cells, in which Nbr was functionally depleted (*nbr*<sup>ko</sup> or *nbr*<sup>ko</sup>;FM-Nbr-CM<sup>OE</sup>), compared to cells containing functional Nbr protein (wt or *nbr*<sup>ko</sup>;FM-Nbr-WT<sup>OE</sup>).



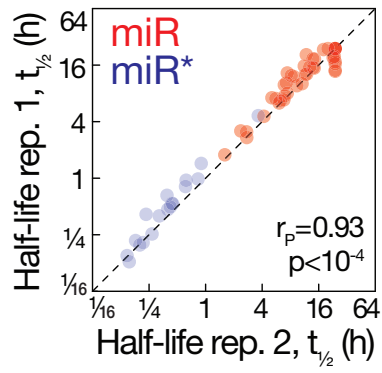

**Figure S5. Robust measurements of miRNA stabilities using metabolic miRNA sequencing.** Related to Figure 4. Comparison of half-life values determined in two independent biological replicates for 42 miR (red) and 18 miR\* (blue) strands. Pearson's correlation coefficient ( $r_p$ ) and associated p-value are shown.

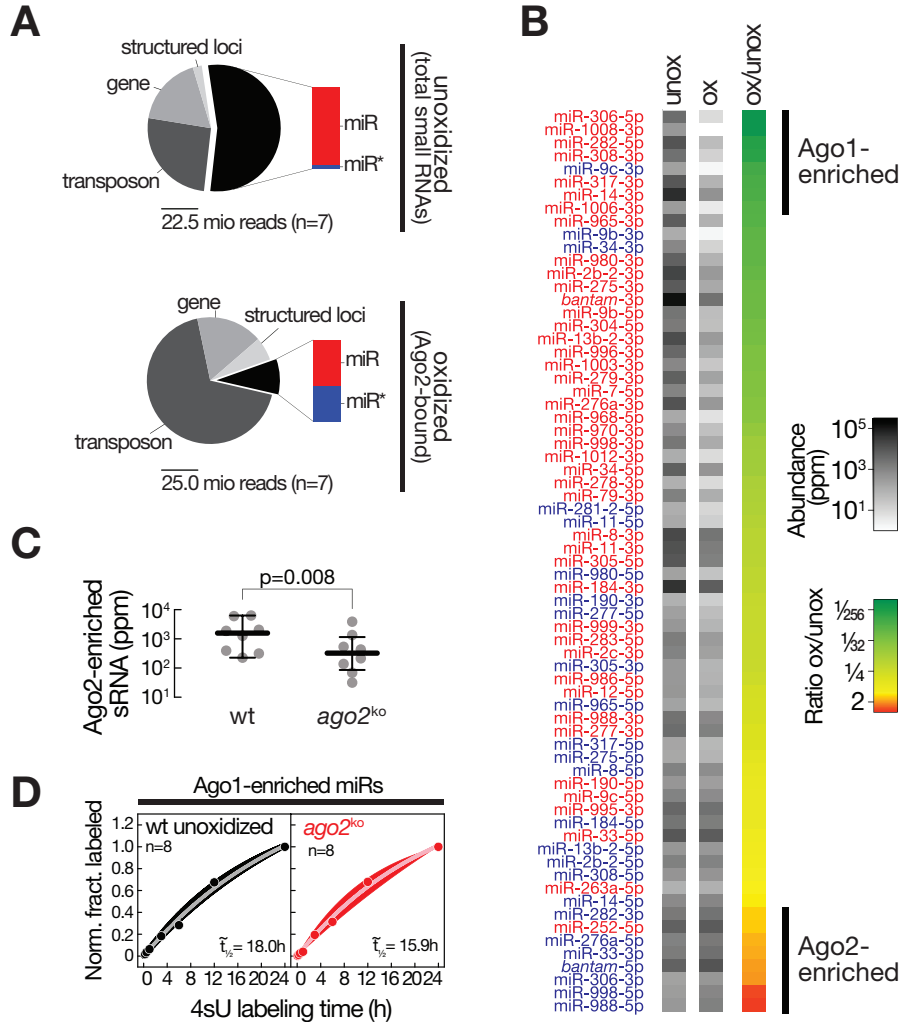

**Figure S6. Argonaute protein identity determines small RNA stability.** Related to Figure 5. **(A)** Pie charts represent the relative abundance of the indicated endo-siRNA classes and miRNAs in small RNA libraries from wild-type *Drosophila* S2 cells. Results from a standard cloning protocol (unoxidized, upper diagram) and from a cloning strategy that enriches for small RNAs with modified 3' termini (oxidized, lower diagram) are shown. The fraction of miRs (red) and miR\*s (blue) is indicated for both libraries. The average distribution of 7 datasets is shown. The average library depth is indicated. **(B)** Heat maps show the relative abundance (in ppm) of miRs (red), and miR\*s (blue) in the indicated libraries (in grayscale). The ratio of relative representations in the libraries indicates preferential association of small RNAs with either Ago1 (green) or Ago2 (red). MicroRNAs classified as Ago1- or Ago2-enriched are indicated. **(C)** Abundance (in ppm) of Ago2-enriched miR and miR\* species in wild-type (wt) and  $ago2^{ko}$  *Drosophila* S2 cells. Median and interquartile range is indicated. P-value (Wilcoxon matched-pairs signed rank test) is shown. **(D)** Median decay kinetics of Ago1-enriched small RNAs (n=8; classified in Figure S11B) in a 4sU metabolic labeling time-course in wild-type (wt, black) or  $ago2^{ko}$  S2 cells (red). Median and interquartile range of single-exponential saturation kinetics (as specified in main text) are shown. The half-life ( $t_{1/2}$ ) as determined by curve-fitting is indicated.
